# Supplementary material for: Modulation of Interleukin-12 activity in the presence of heparin
Source: PubMed Central journal article supplement (PMC5509706; doi:10.1038/s41598-017-05382-1), 2017-07-13
Supplement: 41598_2017_5382_MOESM1_ESM.pdf [file 41598_2017_5382_MOESM1_ESM.pdf]

**Supplementary Methods for:  
Modulation of Interleukin-12 activity in the presence of heparin**

Srinivas Jayanthi<sup>1#</sup>, Bhanu prasanth Koppolu<sup>2,3#</sup>, Khue G. Nguyen<sup>4,5#</sup>, Sean G. Smith<sup>2,3</sup>, Barbara K. Felber<sup>6</sup>, Thallapuram Krishnaswamy Suresh Kumar<sup>1,4\*</sup>, David A. Zaharoff<sup>2,3,4,5\*</sup>

<sup>1</sup> Department of Chemistry and Biochemistry, University of Arkansas, Fayetteville, AR

<sup>2</sup> Department of Biomedical Engineering, University of Arkansas, Fayetteville, AR

<sup>3</sup> Joint Department of Biomedical Engineering, North Carolina State University and the University of North Carolina-Chapel Hill, Raleigh, NC

<sup>4</sup> Cell and Molecular Biology Program, University of Arkansas, Fayetteville, AR

<sup>5</sup> Department of Microbiology and Immunology, University of North Carolina, Chapel Hill, NC

<sup>6</sup> Human Retrovirus Pathogenesis Section, Vaccine Branch-National Cancer Institute, Frederick, MD

# Authors contributed equally

## Supplementary Methods

### CRISPR/Cas9-mediated deletion of IL12R $\beta$ 1 and IL12R $\beta$ 2

Two 20-bp guide sequences, (5'-GGAGCACTCGTAACGATCAC -3') and (5'-CAGGATTAAGTTGTTACGTC-3'), targeting DNA within exon 305 – 419 of *IL12R $\beta$ 1* and exon 717 – 1004 of *IL12R $\beta$ 2*, respectively, were selected from the CRISPR design tool provided by the Zhang lab at MIT (<http://crispr.mit.edu/>). Guide sequences were cloned into separate pCas-Guide-EF1a-GFP plasmids via Origene's cloning service. Plasmids were amplified in *E. coli* and isolated via QIAGEN Plasmid Maxi Kit.

For transfection, NK-92MI cells ( $2 \times 10^6$  cells) were re-suspended in 100 $\mu$ l of electroporation buffer (Harvard Apparatus) and added to electroporation cuvettes. Plasmid encoding gRNA (10 $\mu$ g) was added to the electroporation cuvette and mixed well by pipetting. The cell suspension was electroporated at 250 volts, 25 ohms, and 750  $\mu$ F in a 2 mm cuvette with a ECM630 electroporation system (Harvard Apparatus). The contents of the cuvette were transferred to one well of a 6-well plate containing 1 ml of pre-warmed media. Cells were cultured for 72 hours and sorted for GFP expression on a FACSAriaIII system (BD Biosciences). Sorted cells were subsequently cloned via limiting dilution.

To create a double mutant IL12R $\beta$ 1<sup>mut</sup>/IL12R $\beta$ 2<sup>mut</sup> NK-92MI cell line, IL12R $\beta$ 2 was first functionally deleted. An IL-12R $\beta$ 2<sup>mut</sup> clone was selected and propagated for one month to allow transient GFP expression to subside. IL12R $\beta$ 1 was subsequently functionally deleted using the transfection method described above. Cells were once again sorted and cloned. Functional deletion of IL12R $\beta$ 1 and IL12R $\beta$ 2 was verified by loss of IL-12 responsiveness (see Fig. 5).

### **Analysis of Intracellular IFN- $\gamma$ expression in PBMC subsets**

One million freshly isolated human PBMCs were stimulated with IL-12 alone (200 pg/ml) or IL-12 + heparin (10  $\mu$ g/ml) for 12 hours in a 96 well plate. Monensin (554724; BD Biosciences) was added for the last 10 hours of stimulation to block intracellular transport. After 12 hours of stimulation, cells were rinsed and stained with viability markers (Fixable Viability Stain 510; BD Biosciences) followed by blocking Fc $\gamma$  receptors (564220; BD Biosciences) and staining for the following cell surface markers: CD3 (clone: UCHT1), CD19 (clone: SJ25C1), CD4 (clone: RPA-T4), CD8 (clone: RPA-T8), CD56 (clone: B159) and CD45 (clone: HI30). After surface staining, cells were fixed and permeabilized (554715; BD Biosciences) prior to staining for IFN- $\gamma$  (clone: B27). Twenty thousand live PBMCs were acquired on a BD FACSCelesta (BD Biosciences) and analyzed using FlowJo v10 software.

### **IL12R expression in mutant NK-92MI via flow cytometry and western blot.**

For analysis of IL12R expression via flow cytometry, IL12R $\beta$ 1<sup>mut</sup>/IL12R $\beta$ 2<sup>mut</sup> and wild-type NK-92MI cells were stained with 1  $\mu$ g/10<sup>6</sup> cells of APC-conjugated anti-IL12R $\beta$ 1 (FAB839A; R&D Systems), APC-conjugated anti-IL12R $\beta$ 2 (FAB1959A; R&D Systems) or APC-conjugates mouse IgG1, k isotype control (550854; BD Biosciences). Cells were rinsed twice in cold PBS and read on a BD FACSCelesta. Data were analyzed using FlowJo v10 software.

For qualitative assessment of IL12R expression via western blot, IL12R $\beta$ 1<sup>mut</sup>/IL12R $\beta$ 2<sup>mut</sup> and wild-type NK-92MI cells as well as HEK-293 cells (negative control) were lysed using RIPA lysis buffer with a protease and phosphatase inhibitor cocktail (78440; ThermoFisher). Homogenates were incubated for 5 minutes and then centrifuged at 13,000  $\times$  g for 10 minutes at

4 °C. Cell lysates were collected by withdrawing the supernatant without disturbing the pellet. Protein concentration was estimated via bicinchoninic acid assay (BCA) (23250; Pierce). 50 µg/lane of protein was separated on 12% SDS-PAGE under reduced condition. The proteins were transferred onto a polyvinylidene difluoride (PVDF) membrane and blocked with Odyssey Blocking Buffer (LI-COR Biosciences) at room temperature for 2 h. The membranes were then probed overnight with rabbit anti-IL12Rβ1 antibody (ab96517; Abcam), mouse anti-IL12Rβ2 (MAB19591; R&D Systems) and mouse anti-beta-actin (ab8226; Abcam) in Odyssey Blocking Buffer. Beta-actin was used as the gel loading control. Primary antibodies were used at a dilution of 1:5000. Secondary antibodies, goat anti-rabbit IgG H&L-alkaline phosphatase (ab97048; Abcam) and goat anti-mouse IgG H&L - alkaline phosphatase (ab97020; Abcam) were used at a dilution of 1:5000. After blotting, protein bands were developed with NBT/BCIP substrate solution (34042; ThermoFisher). Qualitative images of blots were taken with an 8.0 megapixel digital camera.
